# Supplementary material
Source: publisher figshare collection journal article supplement (https://tandf.figshare.com/ndownloader/files/20040449)
Supplement: Supplementary file 1 [file 20040449]

Supplement Table 1. Bias of the model parameters in the simulation study

| Censoring  Point |  |  |  |  |  |  |  |  |  |
| --- | --- | --- | --- | --- | --- | --- | --- | --- | --- |
| *Scenario 1* |  |  |  |  |  |  |  |  |  |
| No | -0.0212 | -0.0027 | -0.0005 | -0.0085 | -0.0924 | 0.0679 | -1.6616 | -0.5595 | 0.2055 |
| 20 | -0.1135 | -0.0898 | 0.288 | -0.5216 | 0.19 | -0.4538 | -1.6616 | -0.5595 | 5.3034 |
| 30 | -0.1025 | -0.0936 | 0.3461 | -0.433 | 0.1933 | -0.3126 | -1.6616 | -0.5595 | 2.6638 |
| 40 | -0.0788 | -0.0727 | 0.2379 | -0.2686 | 0.1495 | -0.2072 | -1.6616 | -0.5595 | 1.5003 |
| *Scenario 2* |  |  |  |  |  |  |  |  |  |
| No | -0.0114 | 0.0026 | -0.0134 | 0.0087 | -0.0997 | 0.0724 | -1.6616 | -0.5595 | 0.0242 |
| 20 | -0.1123 | -0.0763 | 0.2463 | -0.4841 | 0.1753 | -0.4411 | -1.6616 | -0.5595 | -4.9301 |
| 30 | -0.1013 | -0.0855 | 0.3581 | -0.4399 | 0.196 | -0.3165 | -1.6616 | -0.5595 | -2.3822 |
| 40 | -0.0781 | -0.0659 | 0.2464 | -0.2753 | 0.1505 | -0.2093 | -1.6616 | -0.5595 | -1.2999 |
| *Scenario 3* |  |  |  |  |  |  |  |  |  |
| No | 0.0073 | 0.0037 | 0.0458 | -0.0559 | -0.0976 | 0.072 | -3.5159 | -0.9755 | 0.2345 |
| 20 | -0.0905 | -0.0967 | 0.2627 | -0.5051 | 0.1684 | -0.4333 | -3.5159 | -0.9755 | 4.4903 |
| 30 | -0.0859 | -0.0889 | 0.2396 | -0.3554 | 0.17 | -0.294 | -3.5159 | -0.9755 | 2.5759 |
| 40 | -0.0589 | -0.0662 | 0.2137 | -0.262 | 0.1638 | -0.2206 | -3.5159 | -0.9755 | 1.5332 |
| *Scenario 4* |  |  |  |  |  |  |  |  |  |
| No | 0.0037 | 0.0022 | 0.0289 | -0.0443 | -0.095 | 0.0704 | -3.5159 | -0.9755 | -0.3089 |
| 20 | -0.083 | -0.1024 | 0.2636 | -0.513 | 0.1624 | -0.4236 | -3.5159 | -0.9755 | -4.6989 |
| 30 | -0.0863 | -0.0911 | 0.2306 | -0.3483 | 0.1708 | -0.2929 | -3.5159 | -0.9755 | -2.6392 |
| 40 | -0.0608 | -0.0685 | 0.1766 | -0.2322 | 0.1727 | -0.2269 | -3.5159 | -0.9755 | -1.5881 |
| *Scenario 5* |  |  |  |  |  |  |  |  |  |
| No | -0.2225 | -0.2221 | -0.063 | 0.0459 | -0.0631 | 0.0462 | -1.6616 | -0.5595 | 0.5969 |
| 20 | -0.2357 | -0.2327 | 0.1514 | -0.3333 | 0.065 | -0.2529 | -1.6616 | -0.5595 | 7.4254 |
| 30 | -0.2504 | -0.2466 | 0.1447 | -0.2226 | 0.1499 | -0.2178 | -1.6616 | -0.5595 | 3.9346 |
| 40 | -0.2432 | -0.2432 | 0.094 | -0.1241 | 0.1217 | -0.1476 | -1.6616 | -0.5595 | 2.2098 |
| *Scenario 6* |  |  |  |  |  |  |  |  |  |
| No | -0.2221 | -0.2228 | -0.0902 | 0.0675 | -0.0623 | 0.0457 | -1.6616 | -0.5595 | 0.5133 |
| 20 | -0.2336 | -0.2337 | 0.1554 | -0.3359 | 0.0765 | -0.2618 | -1.6616 | -0.5595 | 7.3373 |
| 30 | -0.249 | -0.2465 | 0.1599 | -0.2369 | 0.1548 | -0.221 | -1.6616 | -0.5595 | 3.8144 |
| 40 | -0.2422 | -0.2438 | 0.0861 | -0.1185 | 0.134 | -0.157 | -1.6616 | -0.5595 | 2.1459 |
| *Scenario 7* |  |  |  |  |  |  |  |  |  |
| No | -0.0086 | 0.0001 | -0.0162 | 0.0097 | -0.0834 | 0.0617 | -3.5159 | -0.9755 | 0.3289 |
| 20 | -0.0162 | 0.0168 | 0.134 | -0.3095 | 0.0086 | -0.2049 | -3.5159 | -0.9755 | 5.4926 |
| 30 | -0.0404 | -0.0325 | 0.1123 | -0.1836 | 0.1173 | -0.1943 | -3.5159 | -0.9755 | 2.9035 |
| 40 | -0.0329 | -0.0277 | 0.0948 | -0.1182 | 0.0827 | -0.1159 | -3.5159 | -0.9755 | 1.5811 |
| *Scenario 8* |  |  |  |  |  |  |  |  |  |
| No | -0.0171 | 0 | -0.0169 | 0.007 | -0.0825 | 0.061 | -3.5159 | -0.9755 | -0.3696 |
| 20 | -0.0217 | 0.0261 | 0.1268 | -0.3019 | 0.0113 | -0.2079 | -3.5159 | -0.9755 | -5.0883 |
| 30 | -0.0571 | -0.0435 | 0.1025 | -0.1768 | 0.1228 | -0.1986 | -3.5159 | -0.9755 | -2.8426 |
| 40 | -0.0471 | -0.0376 | 0.1036 | -0.1272 | 0.0901 | -0.1224 | -3.5159 | -0.9755 | -1.5958 |
| *Scenario 9* |  |  |  |  |  |  |  |  |  |
| No | -0.0212 | -0.0027 | -0.0006 | -0.0102 | -0.1109 | 0.0815 | -1.6616 | -0.5595 | 0.2055 |
| 20 | -0.1135 | -0.0898 | 0.3456 | -0.6259 | 0.228 | -0.5446 | -1.6616 | -0.5595 | 5.3034 |
| 30 | -0.1025 | -0.0936 | 0.4153 | -0.5196 | 0.232 | -0.3751 | -1.6616 | -0.5595 | 2.6638 |
| 40 | -0.0788 | -0.0727 | 0.2855 | -0.3223 | 0.1794 | -0.2487 | -1.6616 | -0.5595 | 1.5003 |
| *Scenario 10* |  |  |  |  |  |  |  |  |  |
| No | -0.0323 | -0.0153 | -0.0088 | 0.0041 | -0.0638 | 0.0449 | -1.6675 | -0.5542 | -1.1528 |
| 20 | 0.1381 | 0.0185 | 0.1953 | -0.5934 | 0.2409 | -0.648 | -1.6675 | -0.5542 | -26.6021 |
| 30 | -0.0172 | -0.0098 | 0.2133 | -0.4396 | 0.1314 | -0.3706 | -1.6675 | -0.5542 | -10.9412 |
| 40 | -0.0508 | -0.0445 | 0.2521 | -0.3807 | 0.1682 | -0.3105 | -1.6675 | -0.5542 | -5.8994 |
| *Scenario 11* |  |  |  |  |  |  |  |  |  |
| No | -0.0076 | -0.0114 | -0.011 | 0.0104 | -0.0655 | 0.0465 | -3.5173 | -0.974 | 1.0161 |
| 20 | 0.1759 | 0.0357 | 0.1507 | -0.586 | 0.4208 | -0.8126 | -3.5173 | -0.974 | 21.4874 |
| 30 | 0.0083 | 0.0111 | 0.1314 | -0.3695 | 0.2668 | -0.4976 | -3.5173 | -0.974 | 8.3259 |
| 40 | -0.0282 | -0.0242 | 0.2255 | -0.3582 | 0.2042 | -0.3482 | -3.5173 | -0.974 | 5.6806 |
| *Scenario 12* |  |  |  |  |  |  |  |  |  |
| No | -0.0044 | -0.0116 | -0.0002 | 0.0015 | -0.0662 | 0.0471 | -3.5173 | -0.974 | -0.92 |
| 20 | 0.225 | 0.0167 | 0.1375 | -0.5788 | 0.3644 | -0.7551 | -3.5173 | -0.974 | -22.0023 |
| 30 | 0.0189 | 0.0143 | 0.1289 | -0.3653 | 0.2521 | -0.4847 | -3.5173 | -0.974 | -7.403 |
| 40 | -0.0226 | -0.0198 | 0.2007 | -0.3361 | 0.1955 | -0.3408 | -3.5173 | -0.974 | -4.9328 |
| *Scenario 13* |  |  |  |  |  |  |  |  |  |
| No | -0.2292 | -0.2309 | 0.0042 | -0.0106 | -0.0537 | 0.0409 | -1.666 | -0.5556 | 4.619 |
| 20 | -0.0602 | -0.1908 | 0.0537 | -0.3415 | 0.3253 | -0.5805 | -1.666 | -0.5556 | 68.8975 |
| 30 | -0.2014 | -0.2186 | 0.0938 | -0.2294 | 0.153 | -0.2959 | -1.666 | -0.5556 | 40.1473 |
| 40 | -0.2215 | -0.2382 | 0.1101 | -0.1834 | 0.1364 | -0.2168 | -1.666 | -0.5556 | 27.612 |
| *Scenario 14* |  |  |  |  |  |  |  |  |  |
| No | -0.23 | -0.2314 | 0.0123 | -0.0165 | -0.0529 | 0.0405 | -1.666 | -0.5556 | 4.732 |
| 20 | -0.0562 | -0.1958 | 0.0599 | -0.3399 | 0.3558 | -0.6115 | -1.666 | -0.5556 | 71.603 |
| 30 | -0.2015 | -0.2204 | 0.1107 | -0.2447 | 0.1604 | -0.3014 | -1.666 | -0.5556 | 37.8625 |
| 40 | -0.2226 | -0.2408 | 0.121 | -0.194 | 0.1367 | -0.216 | -1.666 | -0.5556 | 26.5356 |
| *Scenario 15* |  |  |  |  |  |  |  |  |  |
| No | -0.03 | -0.0136 | 0.0465 | -0.0401 | -0.0546 | 0.041 | -3.5159 | -0.9755 | 5.4009 |
| 20 | 0.1311 | 0.0888 | 0.1404 | -0.4085 | 0.1765 | -0.4417 | -3.5159 | -0.9755 | 71.619 |
| 30 | -0.0112 | 0.0108 | 0.2218 | -0.3394 | 0.1339 | -0.2778 | -3.5159 | -0.9755 | 41.0164 |
| 40 | -0.0355 | -0.0158 | 0.2364 | -0.2921 | 0.1302 | -0.2104 | -3.5159 | -0.9755 | 22.7955 |
| *Scenario 16* |  |  |  |  |  |  |  |  |  |
| No | -0.0312 | -0.0134 | 0.031 | -0.0301 | -0.0557 | 0.0418 | -3.5159 | -0.9755 | -5.1014 |
| 20 | 0.1309 | 0.0909 | 0.1444 | -0.4099 | 0.1461 | -0.4178 | -3.5159 | -0.9755 | -72.5675 |
| 30 | -0.0087 | 0.0172 | 0.1963 | -0.319 | 0.1087 | -0.2576 | -3.5159 | -0.9755 | -37.4551 |
| 40 | -0.0281 | -0.0188 | 0.2228 | -0.2811 | 0.1265 | -0.2072 | -3.5159 | -0.9755 | -21.3085 |

Supplement Table 2. Root of mean squared error of the model parameters in the simulation study

| Censoring |  |  |  |  |  | | |  | | | |  | | | | |  | | | |  | | | |
| --- | --- | --- | --- | --- | --- | --- | --- | --- | --- | --- | --- | --- | --- | --- | --- | --- | --- | --- | --- | --- | --- | --- | --- | --- |
| Point |
| *Scenario 1* |  |  |  |  |  | | |  | | | |  | | | | |  | | | |  | | | |
| No | 31.37 | 31.49 | 106.62 | 87.23 | 110.03 | | | 89.92 | | | | 205.96 | | | | | 169.64 | | | | 315.7 | | | |
| 20 | 48.22 | 47.91 | 134.47 | 115.91 | 133.48 | | | 115.17 | | | | 207.1 | | | | | 170.59 | | | | 472.26 | | | |
| 30 | 33.03 | 32.81 | 116.62 | 98.38 | 119.12 | | | 100.53 | | | | 206.08 | | | | | 169.74 | | | | 300.67 | | | |
| 40 | 30.32 | 30.31 | 109.42 | 90.73 | 110.75 | | | 91.59 | | | | 206.39 | | | | | 169.99 | | | | 309.88 | | | |
| *Scenario 2* |  |  |  |  |  | | |  | | | |  | | | | |  | | | |  | | | |
| No | 31.85 | 31.78 | 108.44 | 88.97 | 110.17 | | | 90.02 | | | | 205.55 | | | | | 169.3 | | | | 292.58 | | | |
| 20 | 50.9 | 49.15 | 137.63 | 119.99 | 135.53 | | | 116.71 | | | | 206.12 | | | | | 169.79 | | | | 570.39 | | | |
| 30 | 33.1 | 33.04 | 117.32 | 99 | 118.77 | | | 100.24 | | | | 206.57 | | | | | 170.16 | | | | 274.4 | | | |
| 40 | 30.57 | 30.57 | 109.96 | 91.33 | 111.19 | | | 92.05 | | | | 206.07 | | | | | 169.73 | | | | 283.91 | | | |
| *Scenario 3* |  |  |  |  |  | | |  | | | |  | | | | |  | | | |  | | | |
| No | 29.67 | 29.17 | 101.03 | 82.65 | 100.7 | | | 82.43 | | | | 314.15 | | | | | 258.04 | | | | 275.34 | | | |
| 20 | 45.61 | 46.01 | 129.18 | 110.84 | 125.77 | | | 108.01 | | | | 321.56 | | | | | 264.34 | | | | 586 | | | |
| 30 | 30.25 | 29.89 | 106.34 | 89.14 | 105.5 | | | 88.46 | | | | 318.28 | | | | | 261.53 | | | | 252.18 | | | |
| 40 | 28.25 | 27.85 | 101.2 | 83.36 | 100.67 | | | 83.06 | | | | 316.13 | | | | | 259.62 | | | | 265.43 | | | |
| *Scenario 4* |  |  |  |  |  | | |  | | | |  | | | | |  | | | |  | | | |
| No | 29.61 | 29.21 | 101.1 | 82.41 | 100.6 | | | 82.34 | | | | 315.19 | | | | | 258.83 | | | | 275.97 | | | |
| 20 | 47.92 | 46.47 | 130.67 | 112.78 | 127.27 | | | 109.32 | | | | 317.53 | | | | | 260.76 | | | | 1005.12 | | | |
| 30 | 30.18 | 29.81 | 107.15 | 89.79 | 105.37 | | | 88.38 | | | | 318.39 | | | | | 261.58 | | | | 252.17 | | | |
| 40 | 28.12 | 27.85 | 101.31 | 83.54 | 100.44 | | | 82.93 | | | | 314.64 | | | | | 258.44 | | | | 263.58 | | | |
| *Scenario 5* |  |  |  |  |  | | |  | | | |  | | | | |  | | | |  | | | |
| No | 22.68 | 22.71 | 96.03 | 78.47 | 95.66 | | | 78.22 | | | | 206.43 | | | | | 170.03 | | | | 531.7 | | | |
| 20 | 36.15 | 35.63 | 130.41 | 114.42 | 126.34 | | | 110.46 | | | | 207.17 | | | | | 170.64 | | | | 646.74 | | | |
| 30 | 24.35 | 24.35 | 104.09 | 87.75 | 105.72 | | | 89.28 | | | | 206.41 | | | | | 170.02 | | | | 633.03 | | | |
| 40 | 22.28 | 22.33 | 98.64 | 81.68 | 99.39 | | | 82.22 | | | | 205.97 | | | | | 169.66 | | | | 582.61 | | | |
| *Scenario 6* |  |  |  |  |  | | |  | | | |  | | | | |  | | | |  | | | |
| No | 22.79 | 22.67 | 96.11 | 78.81 | 95.67 | | | 78.2 | | | | 206 | | | | | 169.68 | | | | 521.88 | | | |
| 20 | 36.62 | 35.77 | 130.39 | 114.3 | 126.55 | | | 110.63 | | | | 206.69 | | | | | 170.25 | | | | 647.56 | | | |
| 30 | 24.55 | 24.36 | 104.24 | 87.8 | 106.27 | | | 89.81 | | | | 207.23 | | | | | 170.71 | | | | 625.64 | | | |
| 40 | 22.37 | 22.31 | 98.54 | 81.64 | 99.52 | | | 82.35 | | | | 207.17 | | | | | 170.65 | | | | 586.35 | | | |
| *Scenario 7* |  |  |  |  |  | | |  | | | |  | | | | |  | | | |  | | | |
| No | 20.6 | 20.73 | 88.48 | 72.27 | 87.61 | | | 71.68 | | | | 315.46 | | | | | 259.15 | | | | 402.42 | | | |
| 20 | 34.62 | 35.23 | 118.96 | 104.67 | 120.84 | | | 106.28 | | | | 318.26 | | | | | 261.46 | | | | 617.88 | | | |
| 30 | 22.07 | 22.32 | 95.27 | 80.17 | 94.43 | | | 79.29 | | | | 318.44 | | | | | 261.59 | | | | 391.47 | | | |
| 40 | 20.38 | 20.49 | 90.61 | 74.92 | 89.21 | | | 73.6 | | | | 315.72 | | | | | 259.3 | | | | 391.45 | | | |
| *Scenario 8* |  |  |  |  |  | | |  | | | |  | | | | |  | | | |  | | | |
| No | 20.51 | 20.7 | 87.59 | 71.56 | 87.63 | | | 71.7 | | | | 314.52 | | | | | 258.33 | | | | 397.24 | | | |
| 20 | 37.2 | 36.66 | 123.89 | 106.87 | 121.02 | | | 106.4 | | | | 319.32 | | | | | 262.36 | | | | 626.25 | | | |
| 30 | 22.08 | 22.32 | 95.02 | 80.01 | 94.49 | | | 79.4 | | | | 316.46 | | | | | 259.95 | | | | 360.44 | | | |
| 40 | 20.36 | 20.5 | 90.33 | 74.66 | 89.45 | | | 73.83 | | | | 315.85 | | | | | 259.46 | | | | 388.35 | | | |
| *Scenario 9* |  |  |  |  |  | | |  | | | |  | | | | |  | | | |  | | | |
| No | 31.37 | 31.49 | 106.62 | 87.23 | 110.03 | | | 89.92 | | | | 205.96 | | | | | 169.64 | | | | 315.7 | | | |
| 20 | 48.22 | 47.91 | 134.47 | 115.91 | 133.48 | | | 115.17 | | | | 207.1 | | | | | 170.59 | | | | 472.26 | | | |
| 30 | 33.03 | 32.81 | 116.62 | 98.38 | 119.12 | | | 100.53 | | | | 206.08 | | | | | 169.74 | | | | 300.67 | | | |
| 40 | 30.32 | 30.31 | 109.42 | 90.73 | 110.75 | | | 91.59 | | | | 206.39 | | | | | 169.99 | | | | 309.88 | | | |
| *Scenario* 10 |  |  |  |  |  | | |  | | | |  |  | | | | | | |  | | | |
| No | 27.83 | 28.45 | 104.91 | 85.73 | 107.69 | | | 88.01 | | | | 204.44 | | | | | 168.38 | | | | 586.31 | | | |
| 20 | 84.01 | 85.39 | 199.68 | 182.93 | 184.55 | | | 168.56 | | | | 207.74 | | | | | 171.12 | | | | 2516.53 | | | |
| 30 | 50.49 | 49.92 | 153.81 | 136.58 | 152.83 | | | 135.77 | | | | 206.54 | | | | | 170.12 | | | | 1685.21 | | | |
| 40 | 34.74 | 34.98 | 128.93 | 111.16 | 129.76 | | | 112.45 | | | | 207.08 | | | | | 170.57 | | | | 635.25 | | | |
| *Scenario 11* |  |  |  |  |  | | |  | | |  | | | | |  | | |  | | | |
| No | 26.03 | 25.98 | 98.62 | 80.51 | 98.2 | | | 80.35 | | | | 314.02 | | | | | 257.8 | | | | 440.67 | | | |
| 20 | 72.84 | 77.84 | 159.51 | 143.82 | 156.18 | | | 141.14 | | | | 321.24 | | | | | 263.98 | | | | 1358.64 | | | |
| 30 | 46.14 | 46.53 | 138.87 | 122.97 | 133.84 | | | 118.41 | | | | 317.47 | | | | | 260.74 | | | | 839.99 | | | |
| 40 | 32.29 | 32.21 | 117.97 | 101.58 | 117.7 | | | 101.65 | | | | 317.18 | | | | | 260.58 | | | | 578.76 | | | |
| *Scenario 12* |  |  |  |  |  | |  | | |  | | | | |  | | |  | | | |
| No | 26.12 | 25.95 | 99.01 | 80.8 | 98.22 | | | 80.36 | | | | 310.88 | | | | | 255.22 | | | | 418.71 | | | |
| 20 | 71.55 | 69.85 | 157.49 | 142.25 | 162.01 | | | 146.73 | | | | 320.77 | | | | | 263.6 | | | | 1462.96 | | | |
| 30 | 46.49 | 46.31 | 138.5 | 122.91 | 133.4 | | | 118.15 | | | | 320.18 | | | | | 263.1 | | | | 751.4 | | | |
| 40 | 32.94 | 32.63 | 118.3 | 101.77 | 117.73 | | | 101.62 | | | | 317.33 | | | | | 260.81 | | | | 526.21 | | | |
| *Scenario 13* |  |  |  |  |  | |  | | |  | | | | |  | | |  | | | |
| No | 20.31 | 20.5 | 94.02 | 76.82 | 93.12 | | | 76.15 | | | | 206.34 | | | | | 169.99 | | | | 2157.52 | | | |
| 20 | 69.39 | 68.94 | 161.68 | 148.9 | 158.1 | | | 147.09 | | | | 207.86 | | | | | 171.22 | | | | 8306.07 | | | |
| 30 | 38.98 | 37.48 | 144.91 | 127.44 | 131.6 | | | 116.8 | | | | 206.46 | | | | | 170.07 | | | | 16224.94 | | | |
| 40 | 25.3 | 25.21 | 119.66 | 103.86 | 110.78 | | | 95.65 | | | | 206.76 | | | | | 170.3 | | | | 20172.72 | | | |
| *Scenario 14* |  |  |  |  |  | |  | | |  | | | | |  | | |  | | | |
| No | 20.23 | 20.53 | 94.52 | 77.23 | 93.06 | | | 76.09 | | | | 204.84 | | | | | 168.7 | | | | 2193.63 | | | |
| 20 | 60.91 | 62.71 | 158.21 | 145.33 | 157.57 | | | 145.95 | | | | 207.98 | | | | | 171.31 | | | | 8474.79 | | | |
| 30 | 36.26 | 34.95 | 145.02 | 129.09 | 133.55 | | | 119.14 | | | | 207.37 | | | | | 170.81 | | | | 9558.99 | | | |
| 40 | 25.17 | 25.09 | 118.07 | 102.09 | 111.18 | | | 96.01 | | | | 206.35 | | | | | 169.97 | | | | 14478.01 | | | |
| *Scenario 15* |  |  |  |  |  | |  | | |  | | | | |  | | |  | | | |
| No | 18.35 | 18.68 | 83.81 | 68.49 | 85.74 | | | 70.18 | | | | 311.33 | | | | | 255.64 | | | | 2212.2 | | | |
| 20 | 57.65 | 56.42 | 159.7 | 148.69 | 167.58 | | | 157.32 | | | | 320.56 | | | | | 263.47 | | | | 10442.67 | | | |
| 30 | 29.46 | 30.85 | 119.67 | 106.73 | 118.42 | | | 105.14 | | | | 319.42 | | | | | 262.48 | | | | 12044.51 | | | |
| 40 | 22.55 | 23.29 | 101.57 | 87.69 | 102.13 | | | 88.18 | | | | 316.2 | | | | | 259.73 | | | | 8550.9 | | | |
| *Scenario 16* |  |  |  |  |  |  | | |  | | | | |  | | | | | |  | | | |
| No | 18.41 | 18.82 | 83.73 | 68.42 | 85.96 | | | 70.32 | | | | 313.19 | | | | | 257.09 | | | | 2218.23 | | | |
| 20 | 65.07 | 58.7 | 146.71 | 137.8 | 155.63 | | | 146.45 | | | | 320.9 | | | | | 263.68 | | | | 10060.18 | | | |
| 30 | 29.86 | 31.54 | 122.39 | 109.74 | 120.86 | | | 107.8 | | | | 320.34 | | | | | 263.25 | | | | 11230.45 | | | |
| 40 | 22.8 | 23.2 | 102.57 | 88.55 | 101.72 | | | 87.84 | | | | 313.74 | | | | | 257.62 | | | | 8157.75 | | | |

Supplement Table 3. Coverage rate of the model parameters in the simulation study

| Censoring |  |  |  |  |  |  |  |  |  |
| --- | --- | --- | --- | --- | --- | --- | --- | --- | --- |
| Point |
| *Scenario 1* |  |  |  |  |  |  |  |  |  |
| No | 92 | 94 | 98 | 97 | 97 | 97 | 66 | 92 | 89 |
| 20 | 85 | 80 | 85 | 75 | 93 | 84 | 64 | 94 | 14 |
| 30 | 88 | 88 | 90 | 83 | 92 | 87 | 64 | 93 | 62 |
| 40 | 87 | 87 | 94 | 89 | 97 | 96 | 64 | 92 | 85 |
| *Scenario 2* |  |  |  |  |  |  |  |  |  |
| No | 93 | 96 | 97 | 95 | 97 | 97 | 65 | 92 | 89 |
| 20 | 86 | 82 | 89 | 77 | 92 | 85 | 64 | 93 | 18 |
| 30 | 86 | 87 | 90 | 84 | 92 | 88 | 64 | 93 | 60 |
| 40 | 89 | 86 | 92 | 90 | 97 | 95 | 65 | 92 | 85 |
| *Scenario 3* |  |  |  |  |  |  |  |  |  |
| No | 96 | 95 | 94 | 95 | 99 | 99 | 32 | 87 | 91 |
| 20 | 85 | 89 | 93 | 82 | 96 | 86 | 38 | 87 | 9 |
| 30 | 85 | 87 | 94 | 91 | 93 | 89 | 36 | 87 | 46 |
| 40 | 90 | 89 | 94 | 89 | 92 | 90 | 34 | 88 | 77 |
| *Scenario 4* |  |  |  |  |  |  |  |  |  |
| No | 97 | 94 | 93 | 95 | 99 | 99 | 35 | 88 | 92 |
| 20 | 88 | 90 | 94 | 83 | 94 | 82 | 35 | 86 | 10 |
| 30 | 87 | 86 | 94 | 89 | 93 | 89 | 36 | 86 | 48 |
| 40 | 90 | 88 | 92 | 90 | 93 | 90 | 32 | 87 | 73 |
| *Scenario 5* |  |  |  |  |  |  |  |  |  |
| No | 29 | 27 | 92 | 93 | 97 | 97 | 65 | 93 | 95 |
| 20 | 53 | 52 | 87 | 81 | 87 | 87 | 66 | 94 | 27 |
| 30 | 21 | 26 | 91 | 90 | 93 | 89 | 64 | 93 | 68 |
| 40 | 26 | 19 | 93 | 93 | 97 | 95 | 65 | 92 | 91 |
| *Scenario 6* |  |  |  |  |  |  |  |  |  |
| No | 33 | 27 | 92 | 93 | 97 | 96 | 64 | 93 | 95 |
| 20 | 54 | 50 | 87 | 81 | 86 | 86 | 65 | 94 | 28 |
| 30 | 25 | 24 | 91 | 90 | 93 | 91 | 65 | 93 | 66 |
| 40 | 25 | 19 | 94 | 94 | 95 | 95 | 64 | 93 | 89 |
| *Scenario 7* |  |  |  |  |  |  |  |  |  |
| No | 94 | 96 | 88 | 89 | 99 | 99 | 34 | 86 | 93 |
| 20 | 91 | 92 | 87 | 81 | 94 | 90 | 35 | 88 | 21 |
| 30 | 93 | 89 | 92 | 89 | 93 | 91 | 35 | 87 | 62 |
| 40 | 93 | 93 | 91 | 90 | 95 | 95 | 36 | 88 | 88 |
| *Scenario 8* |  |  |  |  |  |  |  |  |  |
| No | 95 | 96 | 90 | 91 | 99 | 99 | 33 | 87 | 93 |
| 20 | 95 | 95 | 88 | 82 | 95 | 91 | 37 | 87 | 18 |
| 30 | 93 | 89 | 93 | 90 | 94 | 91 | 34 | 86 | 63 |
| 40 | 93 | 93 | 92 | 92 | 95 | 93 | 35 | 86 | 89 |
| *Scenario 9* |  |  |  |  |  |  |  |  |  |
| No | 98 | 97 | 97 | 97 | 66 | 92 | 89 | 0 | 0 |
| 20 | 85 | 75 | 93 | 84 | 64 | 94 | 14 | 0 | 0 |
| 30 | 90 | 83 | 92 | 87 | 64 | 93 | 62 | 0 | 0 |
| 40 | 94 | 89 | 97 | 96 | 64 | 92 | 85 | 0 | 0 |
| *Scenario 10* |  |  |  |  |  |  |  |  |  |
| No | 90 | 94 | 93 | 93 | 97 | 97 | 65 | 91 | 92 |
| 20 | 56 | 55 | 70 | 66 | 68 | 64 | 65 | 94 | 9 |
| 30 | 87 | 82 | 85 | 82 | 88 | 86 | 65 | 93 | 31 |
| 40 | 89 | 91 | 88 | 86 | 95 | 87 | 65 | 93 | 43 |
| *Scenario 11* |  |  |  |  |  |  |  |  |  |
| No | 91 | 96 | 95 | 94 | 99 | 99 | 34 | 85 | 92 |
| 20 | 41 | 43 | 68 | 62 | 60 | 50 | 38 | 88 | 3 |
| 30 | 84 | 80 | 89 | 86 | 90 | 80 | 33 | 87 | 10 |
| 40 | 86 | 88 | 90 | 86 | 92 | 89 | 38 | 86 | 28 |
| *Scenario 12* |  |  |  |  |  |  |  |  |  |
| No | 95 | 97 | 94 | 95 | 99 | 99 | 33 | 86 | 95 |
| 20 | 41 | 43 | 73 | 57 | 59 | 48 | 36 | 87 | 2 |
| 30 | 88 | 85 | 91 | 86 | 88 | 81 | 36 | 87 | 11 |
| 40 | 90 | 90 | 93 | 90 | 94 | 88 | 36 | 87 | 31 |
| *Scenario 13* |  |  |  |  |  |  |  |  |  |
| No | 19 | 18 | 94 | 94 | 97 | 95 | 64 | 93 | 97 |
| 20 | 45 | 48 | 65 | 67 | 62 | 59 | 65 | 93 | 24 |
| 30 | 59 | 54 | 89 | 89 | 83 | 84 | 64 | 94 | 42 |
| 40 | 41 | 33 | 92 | 92 | 90 | 89 | 65 | 93 | 73 |
| *Scenario 14* |  |  |  |  |  |  |  |  |  |
| No | 18 | 19 | 94 | 95 | 97 | 96 | 65 | 93 | 96 |
| 20 | 43 | 46 | 62 | 62 | 60 | 58 | 65 | 93 | 22 |
| 30 | 58 | 54 | 90 | 87 | 83 | 83 | 64 | 93 | 45 |
| 40 | 40 | 34 | 93 | 92 | 90 | 89 | 65 | 93 | 69 |
| *Scenario 15* |  |  |  |  |  |  |  |  |  |
| No | 89 | 93 | 94 | 94 | 98 | 98 | 31 | 88 | 86 |
| 20 | 59 | 52 | 62 | 56 | 61 | 57 | 34 | 87 | 17 |
| 30 | 85 | 84 | 74 | 75 | 85 | 81 | 36 | 88 | 31 |
| 40 | 85 | 90 | 81 | 80 | 91 | 90 | 35 | 87 | 59 |
| *Scenario 16* |  |  |  |  |  |  |  |  |  |
| No | 89 | 93 | 93 | 94 | 98 | 98 | 33 | 88 | 87 |
| 20 | 55 | 50 | 64 | 54 | 59 | 55 | 37 | 88 | 14 |
| 30 | 87 | 86 | 78 | 76 | 85 | 85 | 36 | 86 | 33 |
| 40 | 87 | 89 | 83 | 82 | 90 | 90 | 35 | 87 | 60 |
